# Supplementary material for: De-Palmitoylation of Tissue Factor Regulates Its Activity, Phosphorylation and Cellular Functions
Source: MDPI journal article supplement (doi:10.3390/cancers13153837), 2021-07-30
Supplement: s1 [file s1]

De-palmitoylation of tissue factor regulates its activity, phosphorylation and cellular functions

Camille Ettelaie<sup>1\*</sup>, Sophie Featherby<sup>1</sup>, Araci M R Rondon<sup>2</sup>, John Greenman<sup>1</sup>, Henri H  
Versteeg<sup>2</sup>, Anthony Maraveyas<sup>3</sup>

Running title: Regulation of TF function by palmitoylation

<sup>1</sup>Biomedical Section, University of Hull, Cottingham Road, Hull, HU6 7RX, UK. UK,

<sup>2</sup>Einthoven Laboratory for Vascular and Regenerative Medicine, Division of Thrombosis and Hemostasis, Department of Internal Medicine, Leiden University Medical Center, Leiden, The Netherlands <sup>3</sup>Division of Cancer-Hull York Medical School, University of Hull, Cottingham Road, Hull, HU6 7RX, UK.

\*Correspondence to Dr Camille Ettelaie, Biomedical Section, Department of Biological Sciences, University of Hull, Cottingham Road, Hull, HU6 7RX, UK

Email: C.Ettelaie@hull.ac.uk

Tel: +44(0)1482-465528

Fax: +44(0)1482-465458

ORCID number: 0000-0002-6121-5262

# Supplementary Figure S1 Confirmation of fVIIa-HRP activity and binding to TF

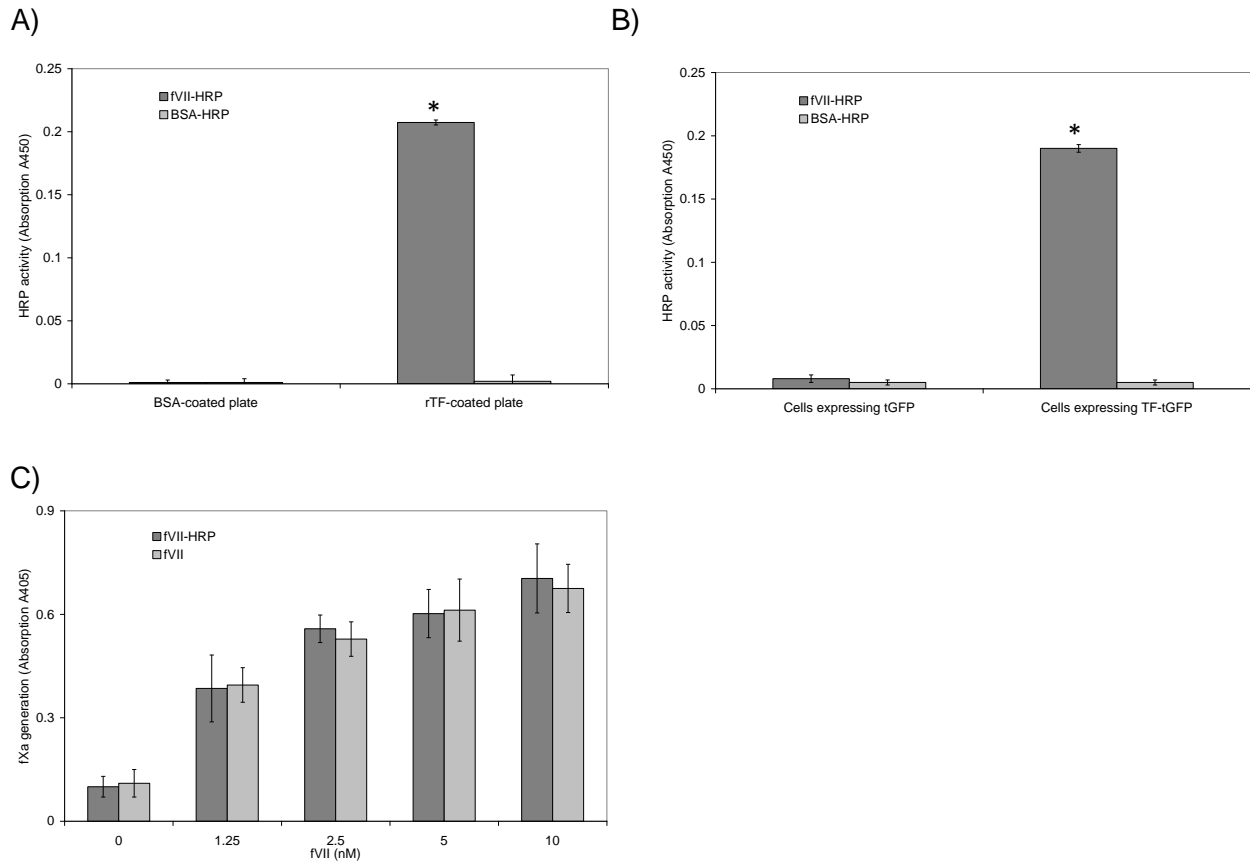

Factor VIIa-HRP and BSA-HRP conjugates were prepared using the Lightning-link HRP kit. Samples (20 nM) were incubated for 15 min in A) 48-well plates pre-coated with recombinant Innovin TF (13 ng/ml) in BSA (1 % w/v) or the vehicle solution, or B) with transfected-HDBEC expressing either TF-tGFP or tGFP. The plates were washed with PBS and the HRP activity determined using the One-solution TMB substrate (200  $\mu$ l). (n= 3, \* = p<0.05 vs. BSA-HRP sample). C) Equal amounts of fVIIa-HRP and unconjugated-fVIIa (0-10 nM) were added to HDBEC expressing TF-tGFP and incubated for 10 min following which fXa-generation was measured. (n= 5).

Supplementary Figure S2 Analysis of the association of TF and PAR2 in the presence and absence of fVIIa, examined in HCAEC

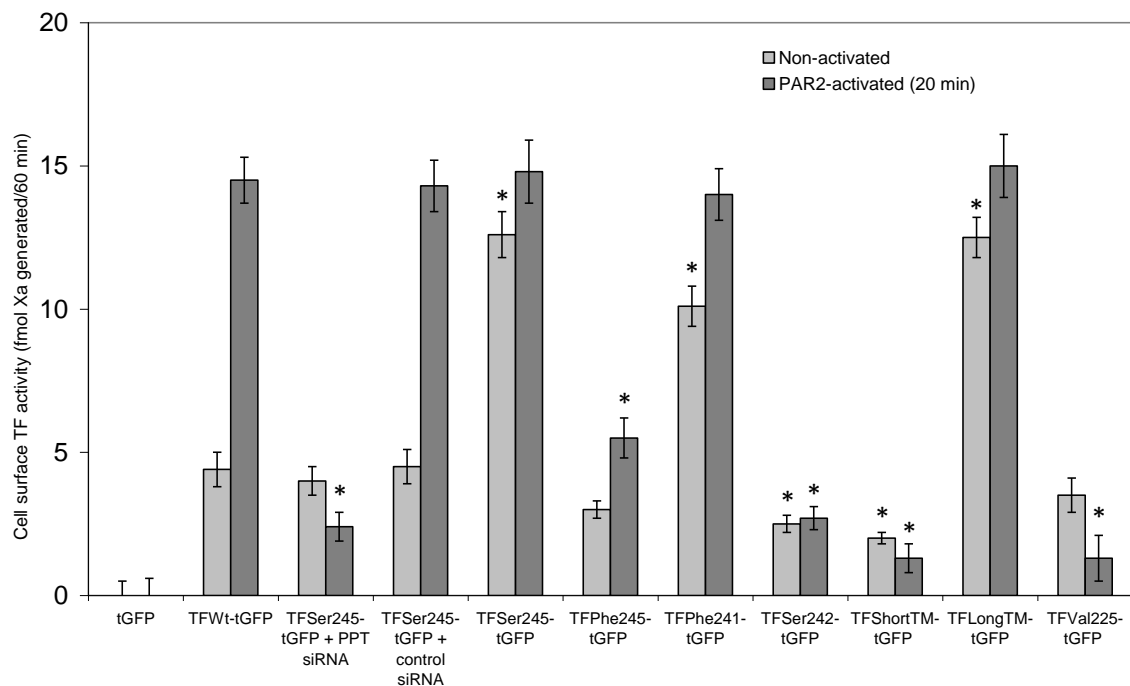

Human coronary artery endothelial cells (HCAEC;  $5 \times 10^4$ ) were co-transfected with combinations of pCMV-Ac-TF-tGFP and PPT-siRNA or control siRNA. HCAEC ( $5 \times 10^4$ ) were also transfected to express TF<sub>Wt</sub>-tGFP, TF<sub>Ser245</sub>-tGFP, TF<sub>Phe245</sub>-tGFP, TF<sub>ShortTM</sub>-tGFP, TF<sub>LongTM</sub>-tGFP, TF<sub>Phe241</sub>-tGFP, TF<sub>Ser242</sub>-tGFP or TF<sub>Val225</sub>-tGFP. Sets of cells were activated using PAR2-agonist peptide and fXa-generation was measured after 20 min. (n= 3, \* = p<0.05 vs. the respective cells expressing TF<sub>Wt</sub>-tGFP).

Supplementary Figure S3 Quantification of HDBEC-derived microvesicles using the Zymuphen Assay

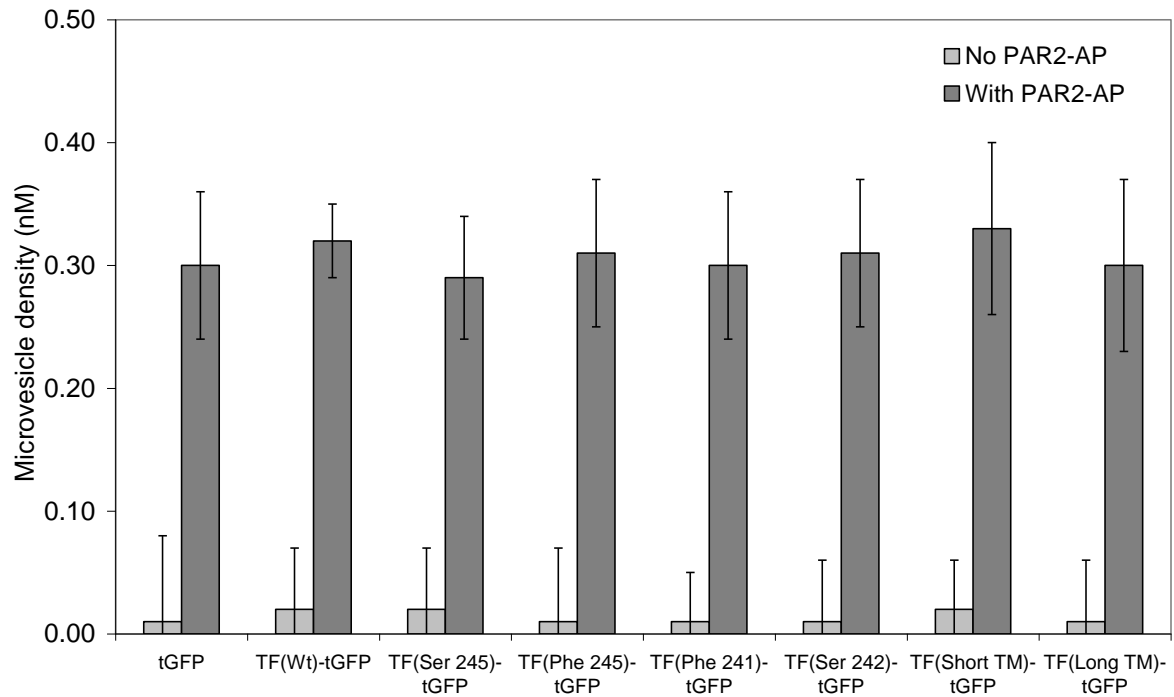

HDBEC ( $5 \times 10^4$ ) were transfected with the TF variants as shown and one set of cells were activated using PAR2-AP (20  $\mu$ M). The density of released microvesicles was then measured using the Zymuphen Microparticle Assay Kit. (n= 4).
